# Supplementary material
Source: PubMed Central journal article supplement (PMC6021619)
Supplement: AAC.00529-18_zac007187241s1.pdf [file AAC.00529-18_zac007187241s1.pdf]

Supplementary materials

**Molecular characterization of *qnrVC* and their novel alleles in *Vibrio* spp. isolated from food products in China**

Yanyan Zhang<sup>1,2</sup>, Zhiwei Zheng<sup>1,2</sup>, Edward Wai-Chi Chan<sup>3</sup>, Ning Dong<sup>2,3</sup>, Xiaodong Xia<sup>1\*</sup>,  
Sheng Chen<sup>2,3\*</sup>

Running title: *qnrVC* and novel alleles in foodborne *Vibrio* spp

<sup>1</sup> College of Food Science and Engineering, Northwest A&F University, Yangling, Shaanxi, China

<sup>2</sup>Shenzhen Key Lab for Food Biological Safety Control, Food Safety and Technology Research Center, Hong Kong PolyU Shen Zhen Research Institute, Shenzhen, P. R. China;

<sup>3</sup>The State Key Lab of Chirosciences, Department of Applied Biology and Chemical Technology, The Hong Kong Polytechnic University, Hung Hom, Kowloon, Hong Kong SAR;

\*Corresponding authors: Xiaodong Xia, email: [foodscixiaodong@yahoo.com](mailto:foodscixiaodong@yahoo.com); or Sheng Chen, email: sheng.chen@polyu.edu.hk

**Keywords:** *qnrVC*, *Vibrio*, ciprofloxacin-resistance

## **Supplementary Materials and methods**

### **Isolation and identification of *Vibrio* spp.**

Different food samples, including fresh shrimp, pork, chicken and beef, were purchased from farmers' markets and supermarkets in Shenzhen, Guangdong Province, China during the period August 2015 to January 2016. *Vibrio* spp. strains were isolated according to methods described previously (1). Up to four suspected colonies from each sample were recovered from thiosulfate citrate-bile salts-sucrose agar and were identified by MALDI-TOF MS using a Bruker MicroFlex LT mass spectrometer (Bruker Daltonics).

### **Antimicrobial susceptibility testing**

All strains of *Vibrio* spp. were subjected to antimicrobial susceptibility test using the standard agar dilution method as described by the Clinical and Laboratory Standards Institute (2).

Fourteen antimicrobials were tested: ampicillin, tetracycline, amikacin, sulfamethoxazole, cefoxitin, ceftriaxone, cefotaxime, meropenem, nalidixic acid, ciprofloxacin, ofloxacin, amoxicillin, chloramphenicol and gentamicin. *Escherichia coli* strain ATCC25922 and *Staphylococcus aureus* strain ATCC29213 were used as the quality control strains. Strains of the same *Vibrio* spp. isolated from the same food samples and displayed identical antimicrobial susceptibility profiles were considered as the same clone and eliminated from further characterization. The remaining strains were considered as non-duplicate isolates.

### **Detection of *qnrVC* genes and mutations in QRDRs**

Genomic DNA of each *Vibrio* spp. isolate was prepared using the boiling method as previously described (3). The *qnrVC* genes were amplified by PCR with primer pairs targeting *qnrVC1*, 3, 6 (*qnrVC136*-F-CAGGTAAATGRTAGTCTTCA, *qnrVC136*-R-TTGTTATGTGCGTAGCC) and *qnrVC4*, 5, 7, (*qnrVC457*-F-

ACTCAAATAGAAAGAGGGCTAG, *qnrVC457*-R- TTGAGGCGTTTGTATGTG).

Mutations in the QRDRs of genes encoding DNA gyrase (*gyrA* and *gyrB*) and topoisomerase IV (*parC* and *parE*) in 40 randomly selected *Vibrio* spp. isolates were determined by PCR amplification as described previously (3, 4). PCR products were sequenced, followed by BLASTN analysis to determine the genetic identity.

### **PFGE subtyping, conjugation, S1-PFGE and hybridization**

Pulsed-field gel electrophoresis (PFGE) was conducted to investigate the genetic relatedness of the identified ciprofloxacin-resistant *Vibrio* spp. isolates with methods described previously. Conjugation assays were performed as previously described to test the transferability of the *qnrVC* genes, utilizing J53 AZ<sup>R</sup> as the recipient strain. Transconjugants were recovered from LB plates supplemented with 0.5µg/mL ciprofloxacin and 100µg/mL sodium azide. S1-PFGE and Southern hybridization with the *qnrVC* probes were performed on both the parental strain and their corresponding transconjugants as previously described (1) .

### **Cloning of *qnrVC8* and *qnrVC9***

To confirm the role of the *qnrVC* variant genes *qnrVC8* and *qnrVC9*, cloning experiments were performed as described previously (5). Briefly, DNA segments were amplified using primer pairs targeting the putative novel quinolone resistance genes *qnrVC8* (*qnrVC8*-*SacI*-F- GATCGAGCTCCAGGTAAATGRTAGTCTTCA, *qnrVC8*- *BamHI* R- TCAGGGATCCTTTGTTATGTGCGTAGCC) and *qnrVC9* (*qnrVC9*- *SacI* -F- GATCGAGCTCACTCAAATAGAAAGAGGGCTAG, *qnrVC9*- *BamHI* -R- TCAGGGATCCTTGAGGCGTTTGTATGTG) and their flanking sequences, respectively. The PCR products were digested with restriction enzymes *BamHI* and *SacI*, and ligated with

a modified cloning vector pET15b, yielding pET15b-*qnrVC8* and pET15b-*qnrVC9*, which were then used to transform *E. coli* DH5 $\alpha$  by electroporation. Transformants were selected on LB plates containing 100  $\mu$ g/mL ampicillin, followed by confirmation of genetic identity through PCR screening with the pair of cloning primers described above. Finally, the recombinant plasmid extracted from DH5 $\alpha$  cell was transformed into competent cells of *E. coli* BL21(DE3) and selected on LB agar (with 100  $\mu$ g/mL ampicillin) again, and the MIC of CIP of BL21(DE3) carrying novel *qnrVC* genes was determined, with *E. coli* BL21(DE3) cells carrying the vector pET15b being used as control. Antimicrobial susceptibility test for *qnrVC8*- and *qnrVC9*-bearing clinical isolates, and the corresponding *E. coli* transformants, was performed by the broth microdilution method, following the CLSI guidelines (6). IPTG was added into MHA broth to induce the expression of *qnrVC* genes during MIC experiment.

## Supplementary Tables and figures

**Supplementary Table S1. Information of *Vibrio* spp. isolated from different food samples.**

| Food sample and<br><i>Vibrio</i> strains isolated | Types of food samples |      |         |      | Total |
|---------------------------------------------------|-----------------------|------|---------|------|-------|
|                                                   | Shrimp                | Pork | Chicken | Beef |       |
| Sample surveyed                                   | 123                   | 465  | 139     | 74   | 801   |
| Positive Samples                                  | 109                   | 112  | 32      | 9    | 262   |
| Positive rate (%)                                 | 89                    | 24   | 23      | 12   | 33    |
| No. of strains isolated                           |                       |      |         |      |       |
| <i>V. parahaemolyticus</i>                        | 252                   | 95   | 36      | 3    | 386   |
| <i>V. alginolyticus</i>                           | 113                   | 42   | 14      | 6    | 175   |
| <i>V. cholerae</i>                                | 11                    | 7    | 1       | 1    | 20    |
| <i>V. vulnificus</i>                              | 3                     | 5    | 0       | 0    | 8     |
| Total                                             | 379                   | 149  | 51      | 10   | 589   |

**Supplementary Table S2. Antimicrobial susceptibilities of different species of *Vibrio* strains of food origin**

| Antibiotics | Break Points<br>(µg/ml) | Resistance rate (%)    |               |               |              |             |
|-------------|-------------------------|------------------------|---------------|---------------|--------------|-------------|
|             |                         | All strains<br>(n=589) | VP<br>(n=386) | VA<br>(n=175) | VC<br>(n=20) | VV<br>(n=8) |
| AMP         | 32                      | 87.4                   | 95.9          | 77.1          | 35.0         | 37.5        |
| AMO         | 32                      | 13.9                   | 12.7          | 16.0          | 20.0         | 12.5        |
| CRO         | 4                       | 18.7                   | 19.7          | 17.1          | 5.0          | 37.5        |
| CTX         | 4                       | 17.7                   | 19.2          | 15.4          | 10.0         | 12.5        |
| MRP         | 4                       | 0.0                    | 0.0           | 0.0           | 0.0          | 0.0         |
| NAL         | 32                      | 15.8                   | 11.1          | 22.9          | 45.0         | 12.5        |
| OFL         | 8                       | 6.6                    | 5.4           | 9.7           | 5.0          | 0.0         |
| CIP         | 4                       | 12.6                   | 9.3           | 17.1          | 40.0         | 0.0         |
| TET         | 16                      | 12.1                   | 13.7          | 9.7           | 0.0          | 12.5        |
| AMK         | 64                      | 0.0                    | 0.0           | 0.0           | 0.0          | 0.0         |
| CHL         | 32                      | 3.7                    | 2.6           | 6.3           | 5.0          | 0.0         |
| GEN         | 16                      | 2.7                    | 3.6           | 0.6           | 5.0          | 0.0         |
| SUL         | 4/76                    | 29.9                   | 26.4          | 37.7          | 35.0         | 12.5        |

AMP, Ampicillin; AMO, Amoxicillin / clavulanic acid; CRO, Ceftriaxone; CTX, Cefotaxime; MRP, Meropenem; NAL, Nalidixic acid; OFL, Ofloxacin; CIP, Ciprofloxacin; TET, Tetracycline; AMK, Amikacin; CHL, Chloramphenicol; GEN, Gentamicin; SUL, Sulfamethoxazole. VP, *V. parahaemolyticus*; VA, *V. alginolyticus*; VC, *V. cholerae*; VV, *V. vulnificus*.

QnrVC4 MDKTDQLYVQADFSHQDMSGQYFKNCKFFCCSFKRANLRDTQFVDCSFIERGELEGCDFS  
 QnrVC5 MDKTDQLYVQADFSHQDMSGQYFKNCKFFCCSFKRANLRDTQFVDCSFIERGELEGCDFS  
 QnrVC7 MDKTDQLYVQADFSHQDLSGQYFKNCKFFCCSFKRANLRDTQFVDCSFIERGELEGCDFS  
 QnrVC9 MDKTDQLYVQADFSHQDLSGQYFKNCKFFCCSFKRANLRDTQFVDCSFIERGELEGCDFS  
 QnrVC8 MEKSKQLYNQVNFESHQNLQEHIFSNCTFIHCNFKRSNLRDSQFINCTFIEQGALEGCDFS  
 QnrVC3 MEKSKQLYNQVNFESHQDLQEHIFSNCTFIHCNFKRSNLRDTQFINCTFIEQGALEGCDFS  
 QnrVC1 MEKSKQLYNQVNFESHQDLQEHIFSNCTFIHCNFKRSNLRDTQFINCTFIEQGALEGCDFS  
 QnrVC6 MEKSKQLYNQVNFESHQDLQEHIFSNCTFIHCNFKRSNLRDTQFINCTFIEQGALEGCDFS  
 \*:\*.\*\*\* \*.:\*\*\*\*:.. : \*.\*\*.\*: \*.\*\*\*:\*\*\*\*:\*\*\*:\*.\*\*\*:\* \*\*\*\*\*

QnrVC4 YSDLRDASFKNCSLSMSYFKGANCFGIEFRECCLKGANFAQASFMNQVSNRMYFCSAYIT  
 QnrVC5 YSDLRDASFKNCSLSMSYFKGANCFGIEFRECCLKGANFSQASFMNQVSNRMYFCSAYIT  
 QnrVC7 YSDLRDASFKNCSLSMSYFKGANCFGIEFRECCLKGANFAQASFMNQVSNRMYFCSAYIT  
**QnrVC9** YSDLRDASFKNCSLSMSYFKGANCFGIEFRECCLKGANF**V**QASFMNQVSNRMYFCSAYIT  
 QnrVC8 YADLRDASFKDCQLSMHFHGKGANCFGIELRDCCLKGANFSQVSFVNQVSNKMYFCSAYIT  
 QnrVC3 YADLRDASFKDCQLSMHFHGKGANCFGIELRDCCLKGANFTQVSFVNQVSNKMYFCSAYIT  
 QnrVC1 YADLRDASFKDCQLSMHFHGKGANCFGIELRDCCLKGANFSQVSFVNQVSNKMYFCSAYIT  
 QnrVC6 YADLRDASFKDCQLSMHFHGKGANCFGIELRDCCLKGANFSQVSFVNQVSNKMYFCSAYIT  
 \*:\*\*\*\*\*.\*.\*\*\*\*:\*\*\*\*\*:\*.\*\*\*:\*\*\*\*\* \*.\*.\*:\*\*\*\*\*:\*\*\*\*\*

QnrVC4 GCNLSYANFERQCIEKCDLFENRWIGANLSGASFKESDLSRGVVFSEGCWSQCRLQGCDLS  
 QnrVC5 GCNLSYANFERQCIEKCDLFENRWIGANLSGASFKESDLSRGVVFSEGCWSQCRLQGCDLS  
 QnrVC7 GCNLSYANFERQCIEKCDLFENRWIGANLSGTSFKESDLSRGVVFSEGCWSQCRLQGCDLS  
 QnrVC9 GCNLSYANFERQCIEKCDLFENRWIGANLSGTSFKESDLSRGVVFSEGCWSQCRLQGCDLS  
**QnrVC8** GCNLSYANFEQQQLIEKCDLFENRWIGANLRGASFKESDLSRGVFS**A**DCWEQFRVQGCDSL  
 QnrVC3 GCNLSYANFEQQQLIEKCDLFENRWIGANLRGASFTEYLSRGDFSEDCWEQFRVQGCDSL  
 QnrVC1 GCNLSYANFEQQQLIEKCDLFENRWIGANLRGASFKESDLSRGVVFSEDCWEQFRVQGCDSL  
 QnrVC6 GCNLSYANFEQQQLIEKCDLFENRWIGANLRGASFKESDLSRGVVFSEDCWEQFRVQGCDSL  
 \*\*\*\*\*.\* \*\*\*\*\*:\*\*\*\*\*:\*.\*\*\*.\* \*\*\*\*\* \*.\*.\* \*.:\*\*\*\*\*

QnrVC4 HSELYGLDPRKVDLTGVKICSWQQEQQLLEQLGLIIVPD  
 QnrVC5 HSELYGLDPRKVDLTGVKICSWQQEQQLLEQLGLIIVPD  
 QnrVC7 HSELYGLDPRKVDLTGVKICSWQQEQQLLEQLGLIIVPD  
 QnrVC9 HSELYGLDPRKVDLTGVKICSWQQEQQLLEQLGLIIVPD  
**QnrVC8** HSEL**N**GLDPRKIDLTGVKICSWQQEQQLLEQLGVIIVPD  
 QnrVC3 HSELYGLDPRKIDLTGVKICSWQQEQQLLEQLGVIIVPD  
 QnrVC1 HSELYGLDPRKIDLTGVKICSWQQEQQLLEQLGVIIVPD  
 QnrVC6 HSELYGLDPRKIDLTGVKICSWQQEQQLLEQLGVIIVPD  
 \*\*\*\* \*\*\*\*\*:\*\*\*\*\*:\*.\*\*\*

**Supplementary Figure S1. Sequence alignment of eight *qnrVC* alleles.** The residues labeled in red or blue were respectively designated the sites in Qnr8 and Qnr9, which were different from other QnrVC proteins.

## References:

1. Li R, Lin D, Chen K, Wong MH, Chen S. 2015. First detection of AmpC beta-lactamase bla(CMY-2) on a conjugative IncA/C plasmid in a *Vibrio parahaemolyticus* isolate of food origin. *Antimicrob Agents Chemother* 59:4106-11.
2. Fonseca EL, Dos Santos Freitas F, Vieira VV, Vicente AC. 2008. New *qnr* gene cassettes associated with superintegron repeats in *Vibrio cholerae* O1. *Emerg Infect Dis* 14:1129-31.
3. Suzita. R ABF, Son R, Abdulmir AS. 2010. Detection of *Vibrio cholerae* in raw cockles (*Anadara granosa*) by polymerase chain reaction. *International Food Research Journal* 17:675-680.
4. Rodkhum C, Maki T, Hirono I, Aoki T. 2008. *gyrA* and *parC* associated with quinolone resistance in *Vibrio anguillarum*. *J Fish Dis* 31:395-9.
5. Vinothkumar K, Kumar GN, Bhardwaj AK. 2016. Characterization of *Vibrio fluvialis qnrVC5* Gene in Native and Heterologous Hosts: Synergy of *qnrVC5* with other Determinants in Conferring Quinolone Resistance. *Front Microbiol* 7:146.
6. CLSI. 2016. Performance Standards for Antimicrobial Susceptibility Testing; Twenty-sixth informational supplement. CLSI document M100-S26, Wayne, PA: Clinical and Laboratory Standards Institute.
